# Supplementary material for: Overweight Infants Hospitalized for Bronchiolitis Associated With Severe Disease
Source: Oxford University Press journal article supplement (doi:10.1542/hpeds.2022-006746), 2022-12-16
Supplement: hpeds.2022-006746supplementarydata.pdf [file hpeds.2022-006746supplementarydata.pdf]

## Supplemental Information

**SUPPLEMENTAL TABLE 3** Exclusions

|                                                           | <i>n</i> |
|-----------------------------------------------------------|----------|
| Total                                                     | 259      |
| Prematurity <37 wk                                        | 155      |
| Pneumonia                                                 | 33       |
| No height recorded during hospitalization                 | 24       |
| Chronic heart disease                                     | 21       |
| Asthma or reactive airway disease                         | 8        |
| Asthma protocol                                           | 6        |
| Prescribed an inhaled corticosteroid                      | 5        |
| Bronchopulmonary dysplasia or chronic lung disease        | 2        |
| Cystic fibrosis                                           | 2        |
| Z-score unable to be calculated because height was <45 cm | 2        |
| Down syndrome                                             | 1        |
| Neuromuscular disorders                                   | 0        |
| Immunodeficiency                                          | 0        |
